# Supplementary material for: Dual-Targeted Nanodiscs Revealing the Cross-Talk between Osteogenic Differentiation of Mesenchymal Stem Cells and Macrophages
Source: PubMed Central journal article supplement — ACS Nano. 2023 Jan 30;17(3):3153–67. doi: 10.1021/acsnano.2c12440 (PMC9933878; doi:10.1021/acsnano.2c12440), 2023-01-30
Supplement: nn2c12440_si_001.pdf [file nn2c12440_si_001.pdf]

## Supplementary Materials

### Dual-Targeted Nanodiscs Revealing the Cross-talk Between Osteogenic

### Differentiation of Mesenchymal Stem Cells and Macrophage

Lang Chen<sup>a, b, #</sup>, Chenyan Yu<sup>a, b, #</sup>, Wanting Xu<sup>a, c, #</sup>, Yuan Xiong<sup>a, b, #</sup>, Peng Cheng<sup>a, b</sup>,  
Ze Lin<sup>a, b</sup>, Zhenhe Zhang<sup>a, b</sup>, Leonard Knoedler<sup>d, e</sup>, Adriana C. Panayi<sup>f, g</sup>, Samuel  
Knoedler<sup>f, h</sup>, Junqing Wang<sup>a, c, \*</sup>, Bobin Mi<sup>a, b, \*</sup>, Guohui Liu<sup>a, b, \*</sup>

<sup>a</sup> Department of Orthopaedics, Union Hospital, Tongji Medical College, Huazhong University of Science and Technology, Wuhan 430022, China

<sup>b</sup> Hubei Province Key Laboratory of Oral and Maxillofacial Development and Regeneration, Wuhan 430022, China

<sup>c</sup> School of Pharmaceutical Sciences, Shenzhen Campus of Sun Yat-sen University, Shenzhen 518100, China.

<sup>d</sup> Department of Plastic, Hand and Reconstructive Surgery, University Hospital Regensburg, Regensburg 93053, Germany

<sup>e</sup> Leibniz Institute of Immunotherapy, University of Regensburg, Regensburg 93053, Germany

<sup>f</sup> Department of Plastic Surgery, Brigham and Women's Hospital, Harvard Medical School, Boston, MA 02152, USA

<sup>g</sup> Department of Hand, Plastic and Reconstructive Surgery, Microsurgery, Burn Center, BG Trauma Center Ludwigshafen, University of Heidelberg, Ludwig-Guttman-Strasse 13, Ludwigshafen/Rhine 67071, Germany

<sup>h</sup> Institute of Regenerative Biology and Medicine, Helmholtz Zentrum München, Max-Lebsche-Platz 31, Munich 81377, Germany

\* Corresponding author

E-mail addresses: wangjunqing@mail.sysu.edu.cn (J. Wang), mibobin@hust.edu.cn (B. Mi), liuguohui@hust.edu.cn (G. Liu)

#Co-first author: Lang Chen, Chenyan Yu, Wanting Xu, and Yuan Xiong contributed equally to this work.

| Chromatin Immunoprecipitation |                         |
|-------------------------------|-------------------------|
| mmBMAL1-500_F                 | AAGGATGCCCCTTAACTCGT    |
| mm BMAL1-500_R                | GTGGGAAGGTGTGGCTAAGA    |
| mRNA                          |                         |
| GAPDH-F                       | AGAAGGCTGGGGCTCATTTG    |
| GAPDH-R                       | AGGGGCCATCCACAGTCTTC    |
| BMAL1-F                       | CTCAGTCACAGGCAACTCCA    |
| BMAL1-R                       | TAGACAGGGTAGGGCAGAGG    |
| CLOCK-F                       | CTGGAGAGAGGAAACCCC      |
| CLOCK-R                       | TGCTTTTCTTTCACGGGAG     |
| CRY1-F                        | CAACAGGTGGCGATTTTTGC    |
| CRY1-R                        | CCGAATCACAAACAGACGAG    |
| PER1-F                        | AGAGTCCCAGACCAGGTGTC    |
| PER1-R                        | GGAGGACGAAACAGGGAAGG    |
| PER2-F                        | CACACTTGCCTCCGAAATAACTC |
| PER2-R                        | AGCGCACGGCTGTCTGA       |
| NR1D1-F                       | ACAAGCAACATTACCAAGCTGA  |

|         |                        |
|---------|------------------------|
| NR1D1-R | CACTCCATAGTGAAGCCTGA   |
| KDM6B-F | AGGAGTCACTGCAGGAGGAGAG |
| KDM6B-R | CTGCTGGGAGAGGTTCTGTA   |

Table. S1 Primers

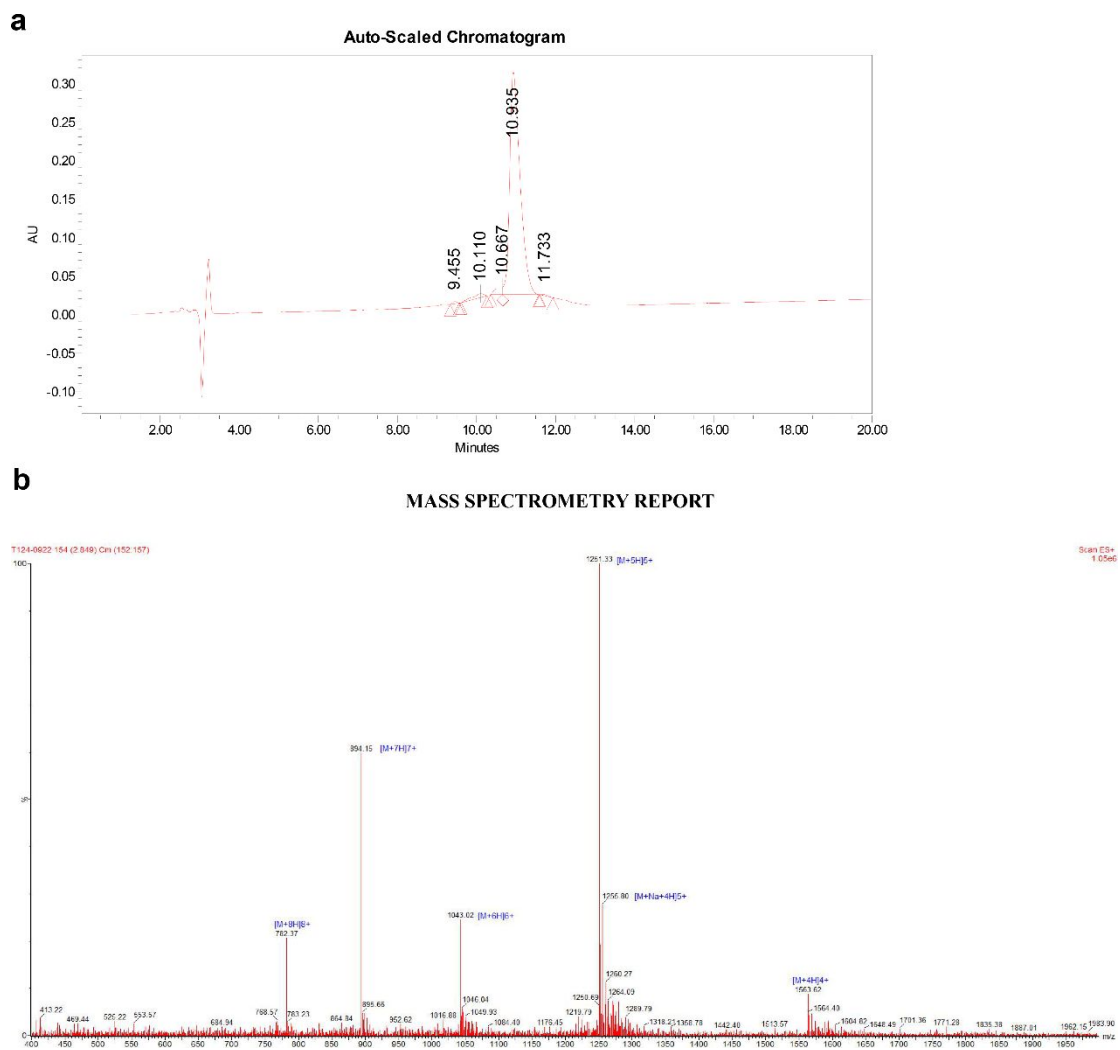

Figure. S1 Purified SDSSD-APA peptide was measured using (a) High performance liquid chromatography (HPLC) and (b) Mass spectrometry (MS).

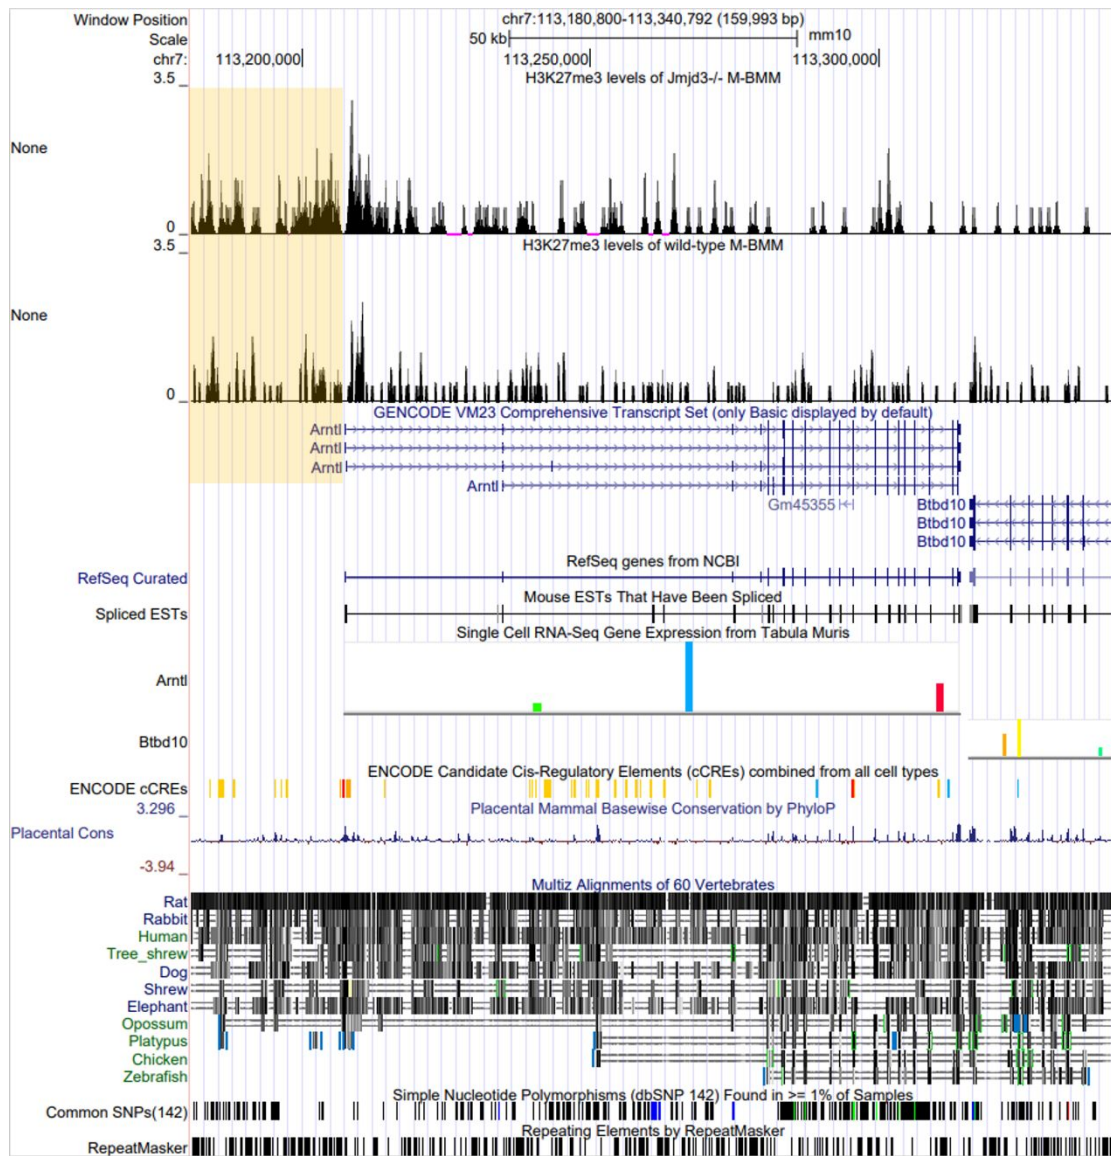

Figure. S2 ChIP-seq analysis results of H3K27me3 levels of WT BMDMs and KDM6B (*Jmjd3*) <sup>-/-</sup> BMDMs<sup>1</sup>.

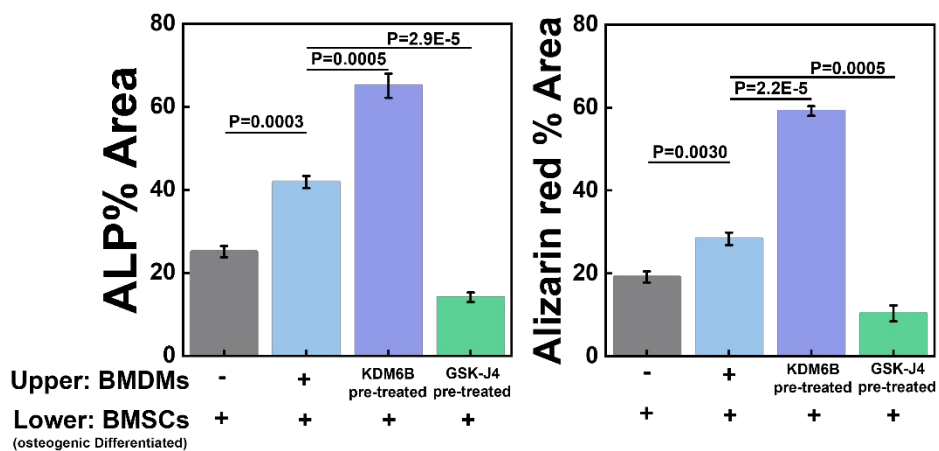

Figure. S3 Statistical results of ALP staining and Alizarin Red staining in Figure. 4e.

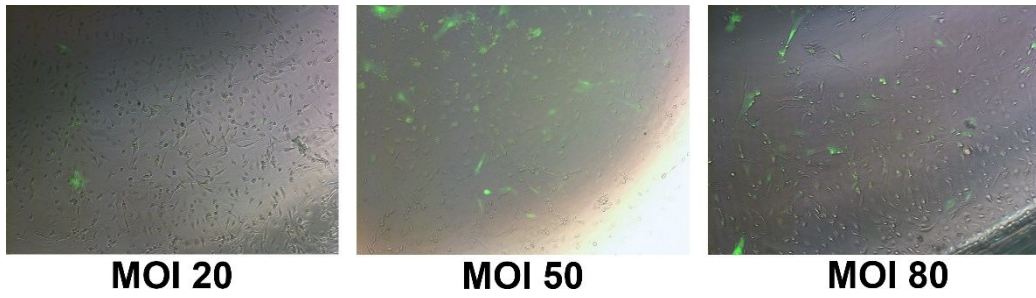

Figure. S4 MOI of BMAL1-overexpression lentivirus infection in BMDMs.

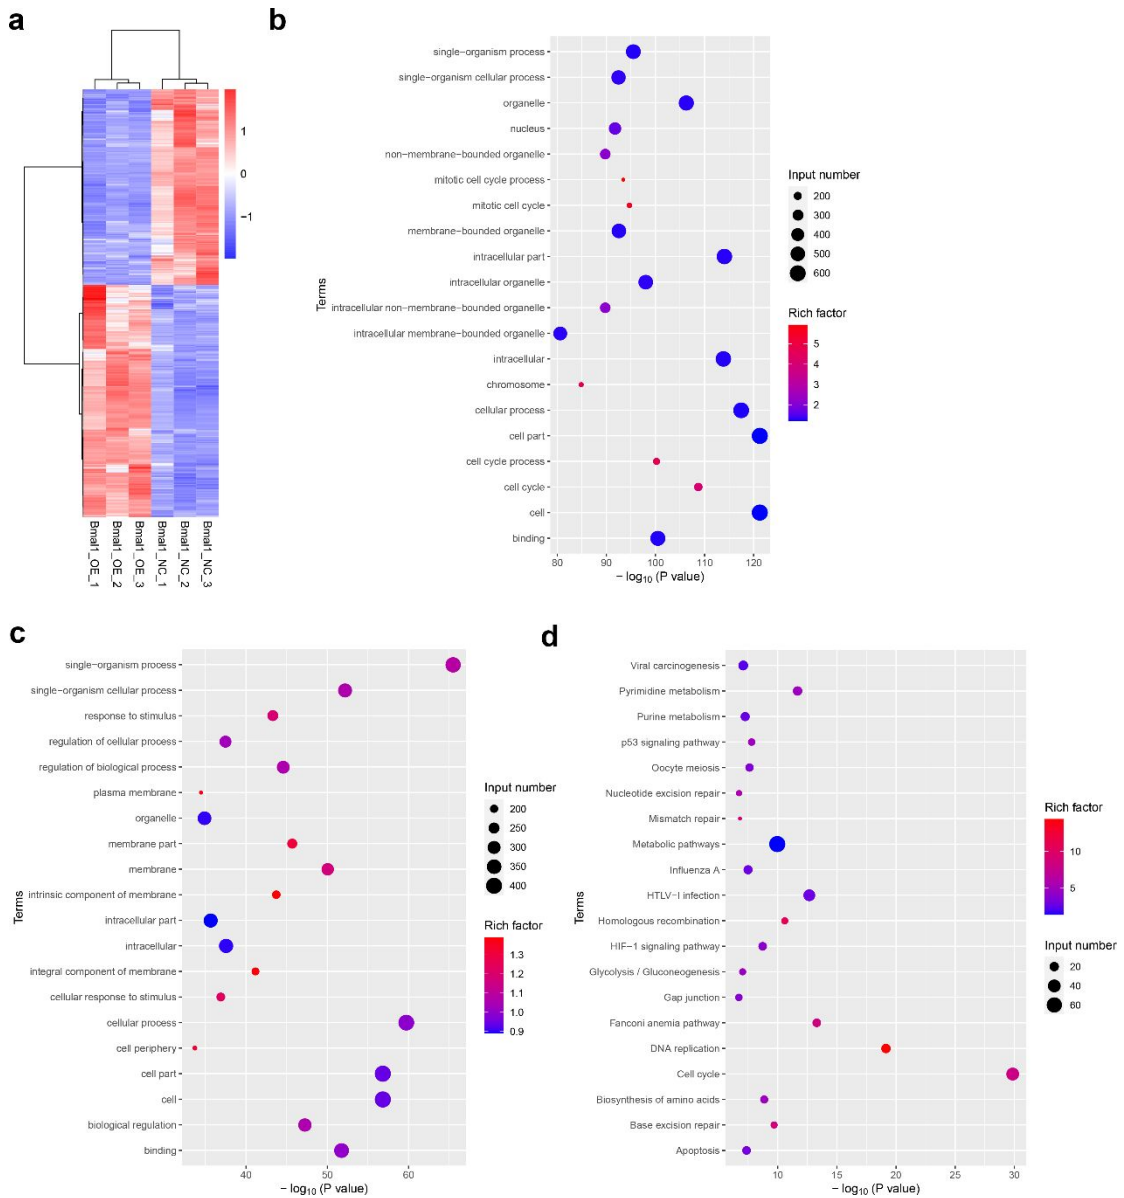

Figure. S5 (a) heatmap of differentially expressed genes. (b) GO analysis results of UP-regulated genes. (c) GO analysis results of Down-regulated genes. (d) KEGG analysis results of UP-regulated genes.

## REFERENCE

- (1) Satoh, T.; Takeuchi, O.; Vandebon, A.; Yasuda, K.; Tanaka, Y.; Kumagai, Y.; Miyake, T.; Matsushita, K.; Okazaki, T.; Saitoh, T.; Honma, K.; Matsuyama, T.; Yui, K.; Tsujimura, T.; Standley, D. M.; Nakanishi, K.; Nakai, K.; Akira, S. The Jmjd3-Irf4 Axis Regulates M2 Macrophage Polarization and Host Responses against Helminth Infection. *Nat Immunol* **2010**, *11* (10), 936–944.  
<https://doi.org/10.1038/ni.1920>.
